# Supplementary material for: Low expression of ARHGAP40 in colorectal cancer facilitates tumor progression by activating the RhoA pathway
Source: Research Square preprint supplement (doi:10.21203/rs.3.rs-7317386/v1), 2025-09-22
Supplement: Supplementary file 1 [file 746f1bdf88c8b83cd946ded3.docx]

**Supplementary Table S2.** Collinearity analysis of factors that associated with ARHGAP40 among colorectal cancer patients.

| **Variables** | **Collinearity Statistics** | |
| --- | --- | --- |
| **Tolerance** | **VIF** |
| **Gender** | 0.754 | 1.327 |
| **Age** | 0.863 | 1.158 |
| **Invasion Depth** | 0.745 | 1.341 |
| **Differentiation** | 0.817 | 1.224 |
| **Lymph mode metastasis** | 0.127 | 7.784 |
| **TNM Stage** | 0.140 | 7.139 |

*Dependent Variable: ARHGAP40 expression
