# Supplementary material for: Low expression of ARHGAP40 in colorectal cancer facilitates tumor progression by activating the RhoA pathway
Source: Research Square preprint supplement (doi:10.21203/rs.3.rs-7317386/v1), 2025-09-22
Supplement: Supplementary file 2 [file a5535843d6dc04616caace0a.docx]

**Supplementary Table S1.** Multivariate analysis of factors associated with ARHGAP40 expression.

| **Variables** | **AOR** | **95% CI** | ***P* -value** |
| --- | --- | --- | --- |
| **Gender** |  |  |  |
| Male | Reference |  |  |
| Female | 0.946 | 0.237-3.774 | 0.937 |
| **Age** |  |  |  |
| ≤65 | Reference |  |  |
| ＞65 | 1.582 | 0.445-5.625 | 0.478 |
| **Invasion Depth** |  |  |  |
| T1/T2 | Reference |  |  |
| T3/T4 | 4.869 | 0.549-43.158 | 0.155 |
| **Differentiation** |  |  |  |
| High/ Moderate | Reference |  |  |
| Poorly | 11.932 | 1.838-77.480 | 0.009** |
| **Lymph mode metastasis** |  |  |  |
| No | Reference |  |  |
| Yes | 19.557 | 0.938-407.887 | 0.055 |
| **TNM Stage** |  |  |  |
| Ⅰ/Ⅱ | Reference |  |  |
| Ⅲ/Ⅳ | 1.803 | 0.108-29.966 | 0.681 |

AOR, adjusted odds ratio; CI, confidence interval.
